# Supplementary material for: Modular transcriptional repertoire and MicroRNA target analyses characterize genomic dysregulation in the thymus of Down syndrome infants
Source: PubMed Central journal article supplement (PMC4884935; doi:10.18632/oncotarget.7120), 2016-02-01
Supplement: oncotarget-07-7497-s001.pdf [file oncotarget-07-7497-s001.pdf]

## Modular transcriptional repertoire and MicroRNA target analyses characterize genomic dysregulation in the thymus of down syndrome infants

### Supplementary Material

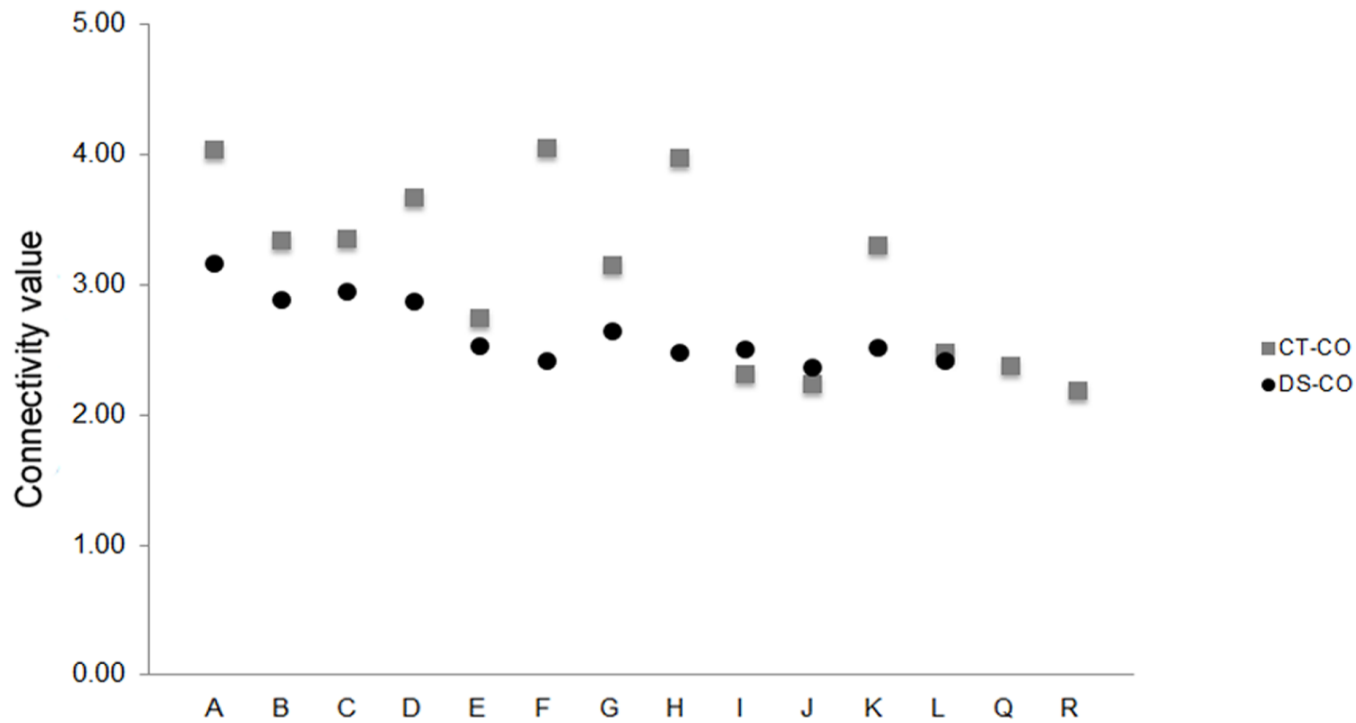

**Figure S1. Community subnetwork connectivities in CO networks.** Dispersion graph of connectivity values for communities' subnetworks in CT-CO (square dots) and DS-CO (circle dots) networks.

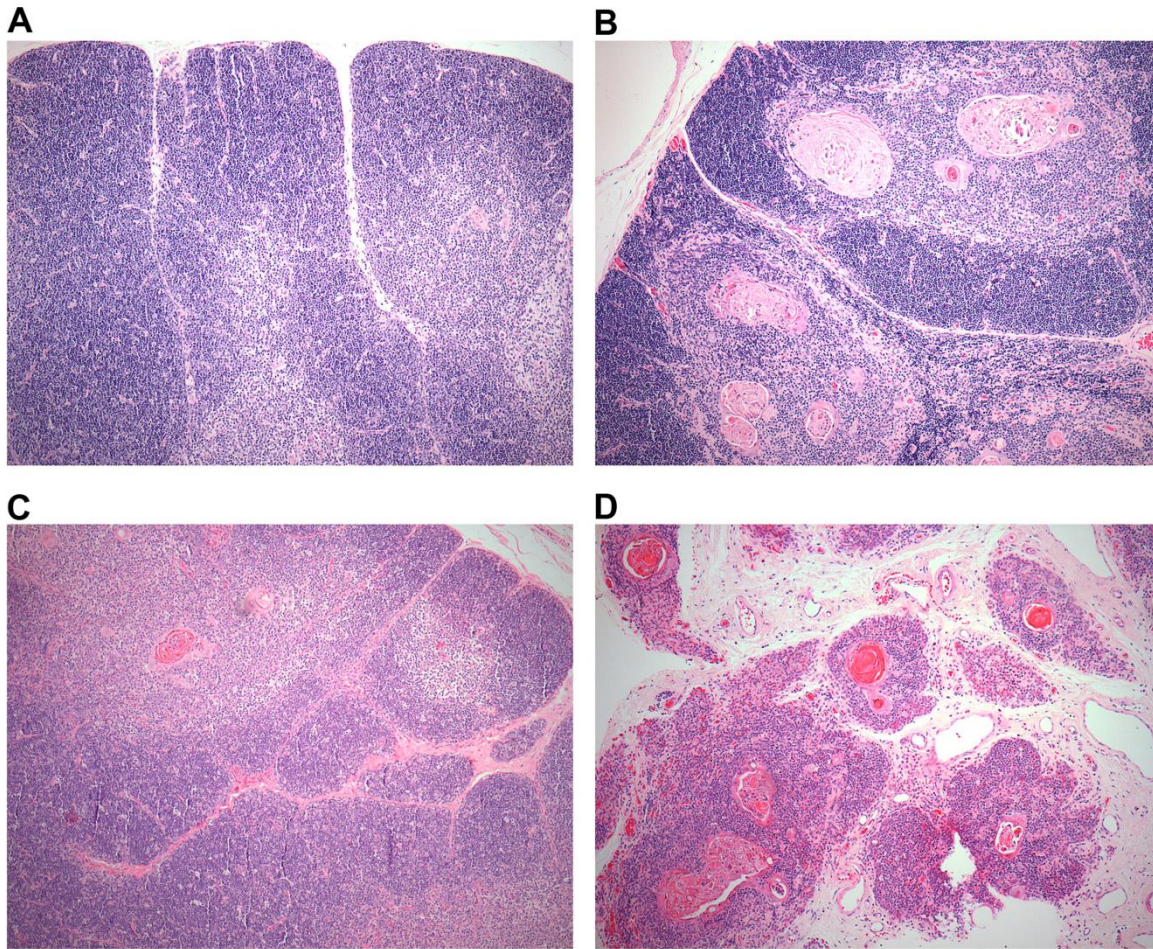

**Figure S2. Histology of the Thymus.** Histological aspect of thymuses obtained from karyotypically normal (A and C) and Down syndrome patients (B and D) included in this study. In A and B the subjects were 9 months old (patients CT9 and DS7). In C and D the subjects were 18 months old (patients CT4 and DS5). Cortical atrophy is present in Down syndrome thymuses. The 18 months old DS patient had more evident morphological changes, with marked cortical atrophy. All figures HE, 100X.



**A**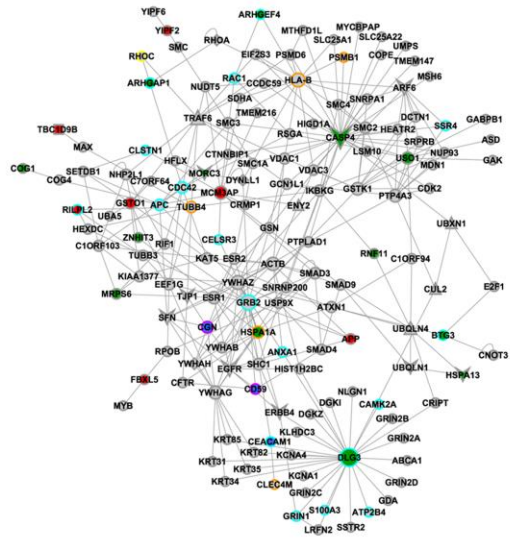**B**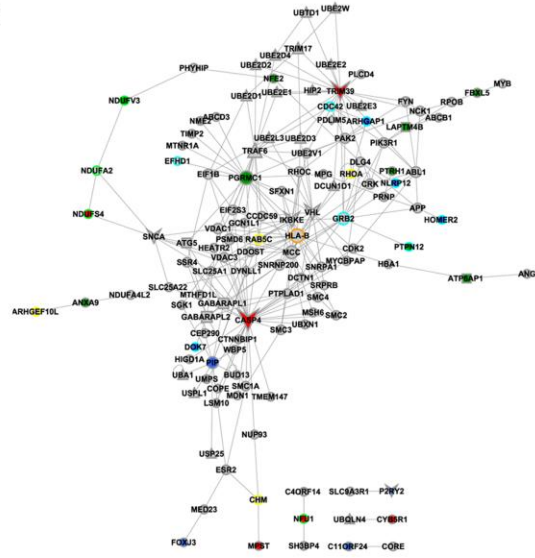**C**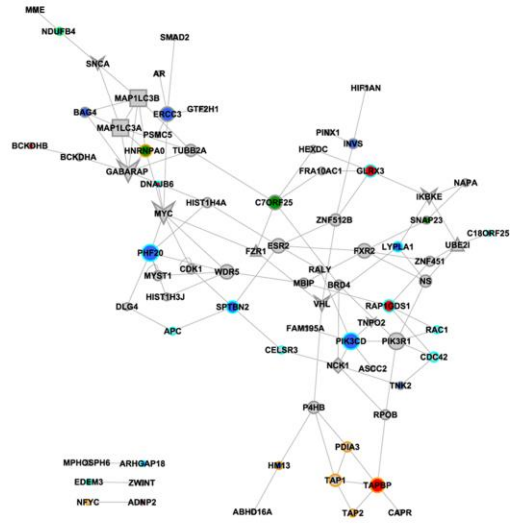**D**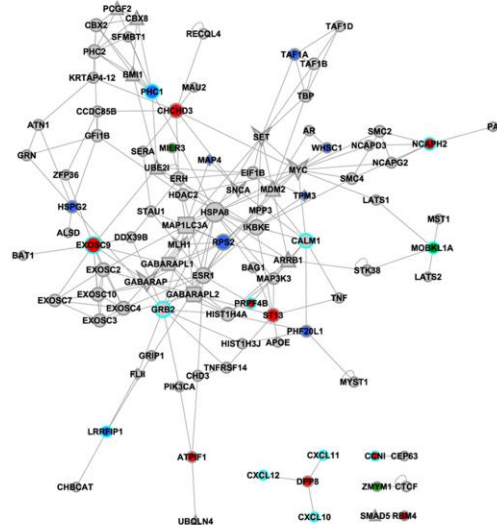

**Figure S3. Interactome for DE and CO networks.** Interactome for CT-DE (A), DS-DE (B), CT-CO (C) and DS-CO (D) selected hubs (depicted in blue), VIPs (depicted in red) and high-hubs (depicted in green) using MINT and IntAct databases. Node size is related to node degree (number of links). Node shapes and border colors represent biological processes, as follows: circle for cell process; circle with light blue border for calcium ion binding, thymic or T cell development and T cell differentiation, circle with orange, purple, yellow or light green border stand for, antigen presentation, Hassall's corpuscles, signaling/GTPase activity or mitochondrial respiratory chain respectively; diamond for actin/cytoskeleton; square for autophagy; triangle for ubiquitination; vee for apoptosis.

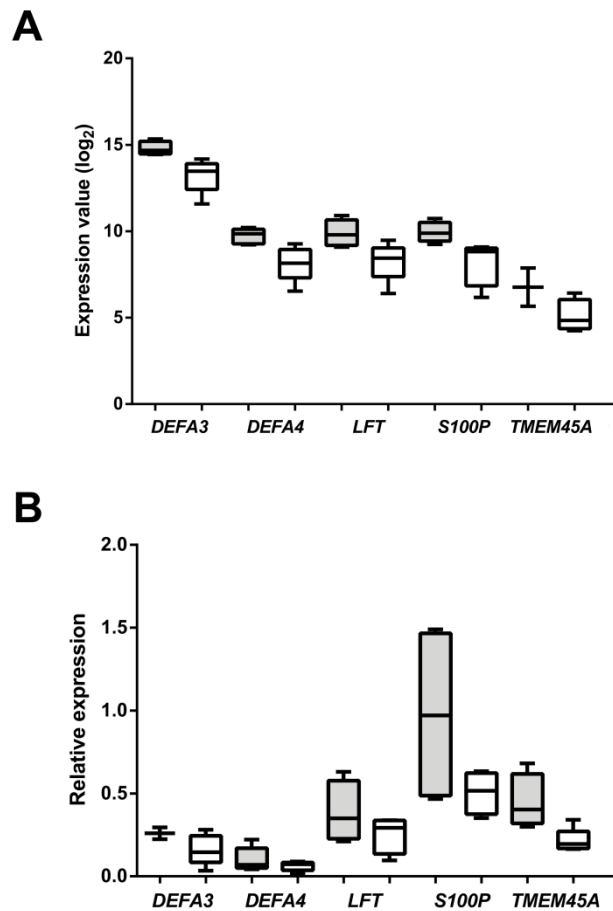

**Figure S4. qPCR validation of DNA microarray data.** In **A** the boxplots representing DNA microarray expression values of five selected genes in DS (gray) and CT (white) groups. In **B** qPCR expression fold changes boxplots of DS and CT groups for the same genes. Values for DS group indicate upregulation.

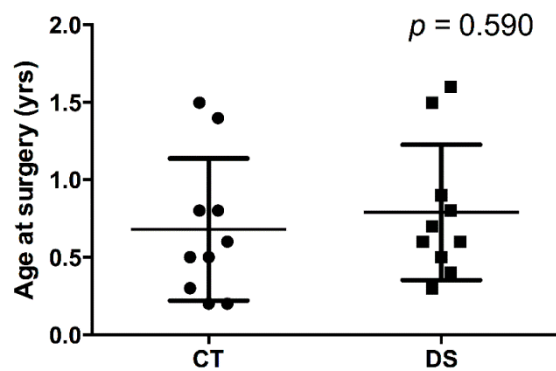

**Figure S5. Patients' age at surgery.** Scatter-plot of age at surgery (in years) of subjects with Down Syndrome and karyotypically normal control subjects and t-test p-value.

**Table S1: Number of genes per community in DE networks**

| <b>Communities</b> | <b>Number of genes</b> |                      |
|--------------------|------------------------|----------------------|
|                    | <b>CT-DE Network</b>   | <b>DS-DE Network</b> |
| A                  | 41                     | 55                   |
| B                  | 40                     | 52                   |
| C                  | 39                     | 50                   |
| D                  | 30                     | 38                   |
| E                  | 26                     | 32                   |
| F                  | 25                     | 30                   |
| G                  | 18                     | 18                   |
| H                  | 14                     | 14                   |
| I                  | 3                      | 11                   |



**Table S2: Number of genes per community in CO networks**

| Communities | Number of genes  |                  |
|-------------|------------------|------------------|
|             | CT- CO Network   | DS-CO Network    |
| A           | 404 <sup>a</sup> | 587 <sup>a</sup> |
| B           | 400 <sup>a</sup> | 533 <sup>a</sup> |
| C           | 397 <sup>a</sup> | 436 <sup>a</sup> |
| D           | 293 <sup>a</sup> | 436 <sup>a</sup> |
| E           | 290 <sup>a</sup> | 393 <sup>a</sup> |
| F           | 248 <sup>a</sup> | 316 <sup>a</sup> |
| G           | 235 <sup>a</sup> | 312 <sup>a</sup> |
| H           | 226 <sup>a</sup> | 289 <sup>a</sup> |
| I           | 213 <sup>a</sup> | 252              |
| J           | 188              | 199              |
| K           | 180 <sup>a</sup> | 189 <sup>a</sup> |
| L           | 165 <sup>a</sup> | 172 <sup>a</sup> |
| M           | 152              | 145              |
| N           | 147              | 119              |
| O           | 132              | 105              |
| P           | 124              | 100              |
| Q           | 117 <sup>a</sup> | 95               |
| R           | 106 <sup>a</sup> | 82               |
| S           | 97               | 70 <sup>a</sup>  |
| T           | 95               | 69               |
| U           | 92 <sup>a</sup>  | 56               |
| V           | 83               | 54               |
| W           | 75               | 53               |

---

|    |    |                 |
|----|----|-----------------|
| X  | 35 | 51              |
| Y  | 32 | 48 <sup>a</sup> |
| Z  | 30 | 46              |
| A' | 21 | 14              |
| B' | -  | 8               |
| C' | -  | 8               |
| D' | -  | 7               |
| E' | -  | 7               |
| F' | -  | 6               |

---

<sup>a</sup>Communities harboring at least one high hierarchy gene and included in the coarse-grained community structure (CGCS) diagrams showed in Figure 4.

**Table S3: Differentially expressed micro RNAs**

| microRNA                          | Mean        | Mean        | <i>p</i> value | fold<br>(DS/CT) |
|-----------------------------------|-------------|-------------|----------------|-----------------|
|                                   | DS<br>group | CT<br>group |                |                 |
| <b>Up-regulated in DS group</b>   |             |             |                |                 |
| hsa-miR-548d-5p                   | 5.771       | 3.265       | 0.007          | 1.768           |
| hsa-miR-196a-5p                   | 4.847       | 3.071       | 0.040          | 1.578           |
| hsa-miR-449a                      | 3.470       | 1.990       | 0.028          | 1.744           |
| hsa-miR-563                       | 5.820       | 4.401       | 0.050          | 1.323           |
| hsa-miR-30b-3p                    | 2.811       | 1.665       | 0.035          | 1.688           |
| hsa-miR-609                       | 3.499       | 2.358       | 0.029          | 1.484           |
| <b>Down-regulated in DS group</b> |             |             |                |                 |
| hsa-miR-548am-5p                  | 2.528       | 3.526       | 0.034          | 0.717           |
| hsa-miR-301a-3p                   | 1.199       | 2.316       | 0.049          | 0.518           |
| hsa-miR-129-2-3p                  | 1.909       | 3.464       | 0.037          | 0.551           |
| hsa-miR-139-5p_v18.0              | 0.886       | 2.667       | 0.023          | 0.332           |
| hsa-let-7f-1-3p                   | 5.290       | 7.083       | 0.041          | 0.747           |
| hsa-miR-602                       | 7.426       | 9.674       | 0.044          | 0.768           |
| hsa-miR-484                       | 4.532       | 6.849       | 0.015          | 0.662           |
| hsa-miR-200b-5p                   | 2.395       | 5.195       | 0.018          | 0.461           |
| hsa-let-7b-3p                     | 3.866       | 6.775       | 0.016          | 0.571           |
| hsa-miR-1267                      | 2.588       | 5.593       | 0.006          | 0.463           |
| hsa-miR-191-3p                    | 10.223      | 13.346      | 0.032          | 0.766           |
| hsa-miR-204-5p                    | 4.519       | 7.983       | 0.035          | 0.566           |
| hsa-miR-486-5p                    | 2.616       | 6.393       | 0.005          | 0.409           |
| hsa-miR-127-3p                    | 3.282       | 7.107       | 0.025          | 0.462           |
| hsa-miR-550a-5p                   | 6.955       | 10.836      | 0.043          | 0.642           |

|                                |         |         |       |       |
|--------------------------------|---------|---------|-------|-------|
| hsa-miR-296-5p                 | 4.230   | 8.499   | 0.010 | 0.498 |
| hsa-miR-361-3p                 | 3.714   | 8.529   | 0.009 | 0.436 |
| hsa-miR-766-3p                 | 13.347  | 18.531  | 0.046 | 0.720 |
| hsa-miR-625-5p                 | 9.784   | 15.070  | 0.043 | 0.649 |
| hsa-miR-149-5p                 | 8.622   | 14.136  | 0.018 | 0.610 |
| hsa-miR-497-5p                 | 5.445   | 11.516  | 0.019 | 0.473 |
| hsa-miR-1249                   | 6.347   | 14.024  | 0.007 | 0.453 |
| hsa-miR-197-3p                 | 23.434  | 32.666  | 0.035 | 0.717 |
| hsa-miR-99b-5p                 | 7.604   | 16.944  | 0.024 | 0.449 |
| hsa-miR-30d-5p                 | 15.219  | 26.102  | 0.035 | 0.583 |
| hsa-miR-140-3p                 | 16.540  | 27.855  | 0.032 | 0.594 |
| hsa-miR-193b-3p                | 10.971  | 22.687  | 0.028 | 0.484 |
| hsa-miR-424-3p                 | 8.870   | 20.677  | 0.033 | 0.429 |
| hsa-miR-125a-5p                | 13.624  | 26.490  | 0.016 | 0.514 |
| hsa-miR-145-5p                 | 13.777  | 27.115  | 0.016 | 0.508 |
| hsa-miR-1280_v18.0             | 20.575  | 34.153  | 0.024 | 0.602 |
| hsa-miR-331-3p                 | 16.576  | 30.223  | 0.019 | 0.548 |
| hsa-miR-151a-5p                | 16.946  | 35.105  | 0.018 | 0.483 |
| hsa-miR-23b-3p                 | 32.651  | 54.707  | 0.045 | 0.597 |
| hsa-miR-455-3p                 | 12.723  | 35.789  | 0.003 | 0.356 |
| hsa-miR-324-3p                 | 39.682  | 69.553  | 0.046 | 0.571 |
| hsa-miR-200c-3p                | 52.551  | 88.058  | 0.034 | 0.597 |
| hsa-miR-30c-5p                 | 61.840  | 100.202 | 0.044 | 0.617 |
| hsa-miR-1274b_v16.0            | 30.730  | 76.706  | 0.026 | 0.401 |
| hsa-miR-29a-3p                 | 52.271  | 120.050 | 0.030 | 0.435 |
| hsa-miR-100-5p                 | 75.757  | 153.017 | 0.031 | 0.495 |
| hsa-miR-205-5p <sup>a</sup>    | 230.549 | 469.303 | 0.011 | 0.491 |
| hsa-miR-720_v18.0 <sup>a</sup> | 309.105 | 575.821 | 0.034 | 0.537 |

|                              |         |          |       |       |
|------------------------------|---------|----------|-------|-------|
| hsa-miR-15b-5p <sup>a</sup>  | 456.515 | 737.685  | 0.040 | 0.619 |
| hsa-miR-181a-5p <sup>a</sup> | 478.509 | 827.574  | 0.037 | 0.578 |
| hsa-miR-125b-5p <sup>a</sup> | 663.695 | 1123.982 | 0.017 | 0.590 |
| hsa-miR-150-5p <sup>a</sup>  | 531.064 | 1256.764 | 0.025 | 0.423 |

---

<sup>a</sup>microRNAs abundantly expressed in DS and CT groups.
