# Supplementary material for: Modular transcriptional repertoire and MicroRNA target analyses characterize genomic dysregulation in the thymus of Down syndrome infants
Source: PubMed Central journal article supplement (PMC4884935; doi:10.18632/oncotarget.7120), 2016-02-01
Supplement: oncotarget-07-7497-s002.pdf [file oncotarget-07-7497-s002.pdf]

**Table S4: Functional description of interactome nodes linked with HH genes products in CT-DE network**

| CT-DE CGN |                 | Protein-related function | Interacting protein in 1st level | Protein-related function                                                                                      | Biological function                      | Node shape (border color)  |
|-----------|-----------------|--------------------------|----------------------------------|---------------------------------------------------------------------------------------------------------------|------------------------------------------|----------------------------|
| Comm      | HH gene product |                          |                                  |                                                                                                               |                                          |                            |
| A         | CASP4           | apoptosis                | GCN1L1                           | Translation factor activity, nucleic acid binding; regulation of translation                                  | cell process                             | circle                     |
|           |                 |                          | PSMD6                            | ATP-dependent proteolysis                                                                                     | cell process                             | circle                     |
|           |                 |                          | CDK2                             | ATP binding; histone kinase activity; cyclin-dependent protein kinase activity                                | cell process/ATP binding                 | circle                     |
|           |                 |                          | MDN1                             | ATPase binding; protein folding                                                                               | cell process/ATP binding                 | circle                     |
|           |                 |                          | MTHFD1L                          | ATP binding; protein homodimerization activity                                                                | cell process/ATP binding                 | circle                     |
|           |                 |                          | SMC1A                            | ATP binding; chromatin binding; microtubule motor activity                                                    | cell process/ATP binding                 | circle                     |
|           |                 |                          | SNRNP200                         | ATP binding; helicase activity                                                                                | cell process/ATP binding                 | circle                     |
|           |                 |                          | EIF2S3                           | GTP binding; GTPase activity; translation initiation factor activity                                          | cell process/binding                     | circle                     |
|           |                 |                          | HEATR2                           | Binding                                                                                                       | cell process/binding                     | circle                     |
|           |                 |                          | MSH6                             | ADP binding; chromatin binding                                                                                | cell process/binding                     | circle                     |
|           |                 |                          | SRPRB                            | GTP binding                                                                                                   | cell process/binding                     | circle                     |
|           |                 |                          | SSR4                             | Calcium ion binding; gene expression                                                                          | cell process/binding/calcium ion binding | circle (light blue border) |
|           |                 |                          | SMC2                             | DNA recombination; DNA repair; cell cycle                                                                     | cell process/cell cycle                  | circle                     |
|           |                 |                          | SMC4                             | Mitotic chromosome condensation; mitotic sister chromatid segregation; cell cycle                             | cell process/cell cycle                  | circle                     |
|           |                 |                          | DCTN1                            | Motor activity; signaling protein activity involved in unfolded protein response; cell death                  | cell process/cell death                  | circle                     |
|           |                 |                          | SMC3                             | ATP binding; microtubule motor activity                                                                       | cell process/cytoskeleton                | circle                     |
|           |                 |                          | MYCBPAP                          | Protein binding; cell differentiation                                                                         | cell process/differentiation             | circle                     |
|           |                 |                          | TMEM147                          | Endoplasmic reticulum                                                                                         | cell process/endoplasmic reticulum       | circle                     |
|           |                 |                          | COPE                             | COPI coating of Golgi vesicle; intra-Golgi vesicle-mediated transport                                         | cell process/Golgi apparatus             | circle                     |
|           |                 |                          | VDAC1                            | Porin activity                                                                                                | cell process/ion transport               | circle                     |
|           |                 |                          | VDAC3                            | Porin activity                                                                                                | cell process/ion transport               | circle                     |
|           |                 |                          | UMPS                             | Lyase activity                                                                                                | cell process/lyase activity              | circle                     |
|           |                 |                          | CCDC59                           | Protein binding; regulation of transcription, DNA-dependent                                                   | cell process/protein binding             | circle                     |
|           |                 |                          | CTNBP1                           | Beta-catenin binding; negative regulation of Wnt receptor signaling pathway                                   | cell process/signaling                   | circle                     |
|           |                 |                          | PTPLAD1                          | Rac protein signal transduction; I-kappaB kinase/NF-kappaB cascade                                            | cell process/signaling                   | circle                     |
|           |                 |                          | HIGD1A                           | Response to stress                                                                                            | cell process/stress response             | circle                     |
|           |                 |                          | LSM10                            | Histone pre-mRNA DCP binding; RNA splicing                                                                    | cell process/transcription               | circle                     |
|           |                 |                          | SNRPA1                           | RNA binding; RNA splicing                                                                                     | cell process/transcription               | circle                     |
|           |                 |                          | NUP93                            | Glucose transport; cytokine-mediated signaling pathway                                                        | cell process/transport                   | circle                     |
|           |                 |                          | SLC25A1                          | Citrate transmembrane transporter activity; cellular lipid metabolic process                                  | cell process/transport                   | circle                     |
|           |                 |                          | SLC25A22                         | L-glutamate transmembrane transporter activity                                                                | cell process/transport                   | circle                     |
|           |                 |                          | UBXN1                            | ATPase binding; polyubiquitin binding                                                                         | ubiquitination                           | triangle                   |
| A         | COG1            | Golgi apparatus          | COG4                             | Protein binding; Golgi vesicle prefusion complex stabilization; protein transport                             | cell process/Golgi apparatus             | circle                     |
| A         | MRPS6           | mitochondrial protein    | ESR1                             | Chromatin binding; estrogen receptor activity; estrogen response element binding                              | cell process/binding                     | circle                     |
|           |                 |                          | C1ORF103                         | Receptor activity                                                                                             | cell process/signaling                   | circle                     |
|           |                 |                          | KIAA1377                         | Protein binding                                                                                               | cell process/binding                     | circle                     |
|           |                 |                          | RIF1                             | Protein binding; cytoskeleton                                                                                 | cell process/cytoskeleton                | circle                     |
| A         | RILPL2          | MHC-II presentation      | TUBB3                            | GTP binding                                                                                                   | cell process/binding                     | circle                     |
|           |                 |                          | TUBB4                            | MHC class I protein binding; cytoskeleton; natural killer cell mediated cytotoxicity                          | cell process/antigen presentation        | circle (orange border)     |
|           |                 |                          | HEXDC                            | Carbohydrate metabolic process; hydrolase activity, hydrolyzing O-glycosyl compounds                          | cell process/hydrolase activity          | circle                     |
| A         | BTG3            | T-cell development       | CNOT3                            | Protein binding; nuclear-transcribed mRNA catabolic process                                                   | cell process/protein binding             | circle                     |
|           |                 |                          | E2F1                             | DNA binding; sequence-specific DNA binding transcription factor activity                                      | cell process/transcription               | circle                     |
|           |                 |                          | ATXN1                            | DNA binding; RNA processing                                                                                   | cell process/transcription               | circle                     |
| A         | ARHGAP1         | T-cell development       | RHOC                             | GTPase activity; negative regulation of I-kappaB kinase/NF-kappaB cascade                                     | GTPase activity/signaling                | circle (yellow border)     |
|           |                 |                          | CDC42                            | GTP binding; GTPase activity; Thymopoiesis                                                                    | cell process/T-cell differentiation      | circle (light blue border) |
|           |                 |                          | RHOA                             | GTP binding; GTPase activity; actin cytoskeleton organization                                                 | cytoskeleton                             | diamond                    |
| A         | RNF11           | TGF-beta signaling       | UBQLN4                           | Polyubiquitin binding; regulation of proteasomal ubiquitin-dependent protein catabolic process                | ubiquitination                           | triangle                   |
|           |                 |                          | IKBKKG                           | I-kappaB kinase/NF-kappaB cascade; T-cell receptor signaling pathway                                          | cell process/signaling                   | circle                     |
| B         | CEACAM1         | T-cell development       | CLEC4M                           | ICAM-3 receptor activity; peptide antigen binding; antigen processing and presentation; cell-cell recognition | cell process/antigen presentation        | circle (orange border)     |
|           |                 |                          | SHC1                             | Ephrin receptor binding; Ras protein signal transduction; MAPK cascade                                        | cell process/signaling                   | circle                     |
| C         | HSPA13          | apoptosis                | UBQLN1                           | Kinase binding; apoptotic process                                                                             | apoptosis                                | vee                        |
|           |                 |                          | UBQLN4                           | Polyubiquitin binding; regulation of proteasomal ubiquitin-dependent protein catabolic process                | ubiquitination                           | triangle                   |
| C         | CD59            | Hassal's corpuscles      | CFTR                             | PDZ domain binding; ATP-binding; phosphorylation-dependent chloride channel activity                          | cell process/ion transport               | circle                     |
|           |                 |                          | GRB2                             | SH3/SH2 adaptor activity; T-cell costimulation                                                                | cell process/T-cell development          | circle (light blue border) |
|           |                 |                          | EGFR                             | ATP binding; actin filament binding; nitric-oxide synthase regulator activity                                 | apoptosis                                | vee                        |
|           |                 |                          | SMAD4                            | DNA binding; chromatin DNA binding                                                                            | cell process/transcription               | circle                     |
| C         | CGN             | Hassal's corpuscles      | YWHAH                            | Actin binding                                                                                                 | actin/binding                            | diamond                    |
|           |                 |                          | SFN                              | Negative regulation of cell proliferation; apoptotic process                                                  | apoptosis                                | vee                        |

|   |         |                         |           |                                                                                                       |                                          |                            |
|---|---------|-------------------------|-----------|-------------------------------------------------------------------------------------------------------|------------------------------------------|----------------------------|
|   |         |                         | TJP1      | Calmodulin binding; apoptotic process                                                                 | apoptosis                                | vee                        |
|   |         |                         | ACTB      | ATP binding; nitric-oxide synthase binding                                                            | cell process/ATP binding                 | circle                     |
|   |         |                         | YWHAB     | Enzyme binding                                                                                        | cell process/binding                     | circle                     |
|   |         |                         | YWHAG     | Insulin-like growth factor receptor binding                                                           | cell process/binding                     | circle                     |
|   |         |                         | YWHAZ     | Protein binding                                                                                       | cell process/binding                     | circle                     |
| D | MORC3   | Epigenetic regulator    | ESR2      | DNA binding; sequence-specific DNA binding transcription factor activity                              | cell process/transcription               | circle                     |
|   |         |                         | HFLX      | Official symbol: GTPBP6. GTP binding protein 6 (putative)                                             | cell process/protein binding             | circle                     |
| D | DLG3    | T-cell development      | DYNLL1    | Actin cytoskeleton organization; activation of pro-apoptotic gene products                            | actin/cytoskeleton                       | diamond                    |
|   |         |                         | ERBB4     | ATP binding; apoptotic process; epidermal growth factor receptor binding                              | apoptosis                                | vee                        |
|   |         |                         | GRIN2B    | Beta-catenin binding; cell adhesion molecule binding                                                  | cell process/adhesion                    | circle                     |
|   |         |                         | LRFN2     | Cell junction                                                                                         | cell process/adhesion                    | circle                     |
|   |         |                         | NLGN1     | Neurexin family protein binding; cell adhesion molecule binding                                       | cell process/adhesion                    | circle                     |
|   |         |                         | DGKI      | ATP binding; diacylglycerol kinase activity                                                           | cell process/ATP binding                 | circle                     |
|   |         |                         | DGKZ      | ATP binding; diacylglycerol kinase activity; cell migration                                           | cell process/ATP binding                 | circle                     |
|   |         |                         | KLHDC3    | Chromatin binding                                                                                     | cell process/binding                     | circle                     |
|   |         |                         | ANXA1     | Calcium ion binding                                                                                   | cell process/binding/calcium ion binding | circle (light blue border) |
|   |         |                         | S100A3    | Calcium ion binding                                                                                   | cell process/binding/calcium ion binding | circle (light blue border) |
|   |         |                         | ATP2B4    | Calmodulin binding                                                                                    | cell process/calmodulin binding          | circle (light blue border) |
|   |         |                         | CAMK2A    | Calmodulin binding; positive regulation of NF-kappaB transcription factor activity                    | cell process/calmodulin binding          | circle (light blue border) |
|   |         |                         | GRIN1     | Calmodulin binding;                                                                                   | cell process/calmodulin binding          | circle (light blue border) |
|   |         |                         | CRIP1     | PDZ domain binding; cytoplasmic microtubule organization;                                             | cell process/cytoskeleton                | circle                     |
|   |         |                         | KRT31     | Structural constituent of cytoskeleton                                                                | cell process/cytoskeleton                | circle                     |
|   |         |                         | KRT34     | Structural molecule activity; intermediate filament                                                   | cell process/cytoskeleton                | circle                     |
|   |         |                         | KRT35     | Structural molecule activity; intermediate filament                                                   | cell process/cytoskeleton                | circle                     |
|   |         |                         | KRT82     | Structural constituent of epidermis; keratin filament                                                 | cell process/cytoskeleton                | circle                     |
|   |         |                         | KRT85     | Structural molecule activity; keratin filament                                                        | cell process/cytoskeleton                | circle                     |
|   |         |                         | GDA       | Guanine deaminase activity                                                                            | cell process/deaminase activity          | circle                     |
|   |         |                         | GRIN2A    | Calcium channel activity; cell adhesion molecule binding                                              | cell process/ion transport               | circle                     |
|   |         |                         | GRIN2C    | Extracellular-glutamate-gated ion channel activity                                                    | cell process/ion transport               | circle                     |
|   |         |                         | GRIN2D    | Extracellular-glutamate-gated ion channel activity                                                    | cell process/ion transport               | circle                     |
|   |         |                         | KCNA1     | Potassium channel activity                                                                            | cell process/ion transport               | circle                     |
|   |         |                         | SSTR2     | G-protein coupled receptor activity                                                                   | cell process/signaling                   | circle                     |
|   |         |                         | HIST1H2BC | DNA binding; defense response to bacterium                                                            | cell process/transcription               | circle                     |
|   |         |                         | ABCA1     | ATP binding; cholesterol transporter activity                                                         | cell process/transport                   | circle                     |
|   |         |                         | CUL2      | Ubiquitin protein ligase binding; induction of apoptosis by intracellular signals                     | ubiquitination                           | triangle                   |
| D | ARHGEF4 | T-cell development      | HLA-B     | MHC class I receptor activity; antigen processing and presentation of peptide antigen via MHC class I | cell process/antigen presentation        | circle (orange border)     |
|   |         |                         | RAC1      | T-cell costimulation; actin filament polymerization                                                   | cell process/T-cell costimulation        | circle (light blue border) |
| E | GSTO1   | stress response         | UBA5      | ATP binding                                                                                           | cell process/ATP binding                 | circle                     |
|   |         |                         | KIAA1377  | Protein binding                                                                                       | cell process/binding                     | circle                     |
|   |         |                         | EEF1G     | Protein binding; translation elongation factor activity                                               | cell process/protein binding             | circle                     |
|   |         |                         | C7ORF64   | Official symbol: RBM48. RNA binding                                                                   | cell process/transcription               | circle                     |
|   |         |                         | SETDB1    | DNA binding; regulation of transcription, DNA-dependent                                               | cell process/transcription               | circle                     |
|   |         |                         | KAT5      | Histone acetyltransferase activity; chromatin modification                                            | cell process/transferase activity        | circle                     |
|   |         |                         | TRAF6     | Histone deacetylase binding; ubiquitin-protein ligase activity                                        | ubiquitination                           | triangle                   |
| E | APP     | cell process            | ACTB      | ATP binding; nitric-oxide synthase binding                                                            | cell process/ATP binding                 | circle                     |
|   |         |                         | YWHAZ     | Protein binding                                                                                       | cell process/binding                     | circle                     |
|   |         |                         | SHC1      | Ephrin receptor binding; Ras protein signal transduction; MAPK cascade                                | cell process/signaling                   | circle                     |
|   |         |                         | GRB2      | SH3/SH2 adaptor activity; T-cell costimulation                                                        | cell process/T-cell development          | circle (light blue border) |
| F | FBXL5   | Thymic microenvironment | RPOB      | Official symbol: POLR1B. Transcription of ribosomal RNA (rRNA) genes and production of rRNA           | cell process/transcription               | circle                     |
|   |         |                         | MYB       | DNA binding; chromatin remodeling; regulation of histone H3-K9 methylation                            | cell process/transcription               | circle                     |
| F | MCM3AP  | cell proliferation      | APC       | T-cell differentiation in thymus; microtubule binding                                                 | cell process/T-cell differentiation      | circle (light blue border) |
|   |         |                         | SMAD9     | Transforming growth factor beta receptor; pathway-specific cytoplasmic mediator activity              | cell process                             | circle                     |
|   |         |                         | CELSR3    | G-protein coupled receptor activity; cell adhesion; calcium ion binding                               | cell process/binding/calcium ion binding | circle (light blue border) |
|   |         |                         | CLSTN1    | Calcium ion binding; cell adhesion                                                                    | cell process/binding/calcium ion binding | circle (light blue border) |
|   |         |                         | CRMP1     | Dihydropyrimidinase activity; cytoskeleton                                                            | cell process/cytoskeleton                | circle                     |
|   |         |                         | TMEM216   | Cilium morphogenesis; cytoskeleton                                                                    | cell process/cytoskeleton                | circle                     |
|   |         |                         | SDHA      | Electron carrier activity; oxidation-reduction process                                                | cell process/electron transport          | circle                     |
|   |         |                         | RAC1      | T-cell costimulation; actin filament polymerization                                                   | cell process/T-cell costimulation        | circle (light blue border) |
|   |         |                         | CDC42     | GTP binding; GTPase activity; Thymopoiesis                                                            | cell process/T-cell differentiation      | circle (light blue border) |
|   |         |                         | SMAD3     | Beta-catenin binding; chromatin DNA binding                                                           | cell process/transcription               | circle                     |
|   |         |                         | NUDT5     | ADP-ribose diphosphatase activity                                                                     | cell process/transferase activity        | circle                     |
|   |         |                         | ENY2      | Transcription coactivator activity; chromatin modification; histone deubiquitination                  | ubiquitination                           | triangle                   |
| F | USO1    | ER-golgi                | ARF6      | GTPase activity; apoptotic process                                                                    | apoptosis                                | vee                        |
|   |         |                         | GAK       | ATP binding; cell junction; heat shock protein binding                                                | cell process/ATP binding                 | circle                     |

|   |         |                      |         |                                                                                                         |                                    |        |
|---|---------|----------------------|---------|---------------------------------------------------------------------------------------------------------|------------------------------------|--------|
|   |         |                      | C1ORF94 | Protein binding                                                                                         | cell process/binding               | circle |
|   |         |                      | ASD     | Official symbol: ARSD. Member of the sulfatase family; correct composition of bone and cartilage matrix | cell process/cytoskeleton          | circle |
|   |         |                      | PTP4A3  | Hydrolase activity; early endosome                                                                      | cell process/hydrolase activity    | circle |
|   |         |                      | GABPB1  | GA-binding protein transcription factor, beta subunit                                                   | cell process/transcription         | circle |
|   |         |                      | RSGA    | Official symbol: ZNF24. Regulation of transcription, DNA-dependent                                      | cell process/transcription         | circle |
|   |         |                      | GSTK1   | Glutathione transferase activity                                                                        | cell process/transferase activity  | circle |
| F | TBC1D9B | autophagy            | MAX     | Sequence-specific DNA binding transcription factor activity                                             | cell process/transcription         | circle |
| G | HSPA1A  | antigen presentation | EGFR    | ATP binding; actin filament binding; nitric-oxide synthase regulator activity                           | apoptosis                          | vee    |
|   |         |                      | ESR1    | Chromatin binding; estrogen receptor activity; estrogen response element binding                        | cell process/binding               | circle |
|   |         |                      | YWHAB   | Enzyme binding                                                                                          | cell process/binding               | circle |
|   |         |                      | YWHAG   | Insulin-like growth factor receptor binding                                                             | cell process/binding               | circle |
|   |         |                      | YWHAZ   | Protein binding                                                                                         | cell process/binding               | circle |
|   |         |                      | CFTR    | PDZ domain binding; ATP-binding; phosphorylation-dependent chloride channel activity                    | cell process/ion transport         | circle |
|   |         |                      | ATXN1   | DNA binding; RNA processing                                                                             | cell process/transcription         | circle |
|   |         |                      | ESR2    | DNA binding; sequence-specific DNA binding transcription factor activity                                | cell process/transcription         | circle |
|   |         |                      | SMAD3   | Beta-catenin binding; chromatin DNA binding                                                             | cell process/transcription         | circle |
| G | ZNHIT3  | transcription        | ESR1    | Chromatin binding; estrogen receptor activity; estrogen response element binding                        | cell process/binding               | circle |
|   |         |                      | NHP2L1  | RNA binding; RNA splicing                                                                               | cell process/transcription         | circle |
| G | YIPF2   | ER-golgi             | SMC     | Official symbol: DYM. Normal skeletal development and brain function                                    | cell process/development           | circle |
|   |         |                      | YIPF6   | Endoplasmic reticulum                                                                                   | cell process/endoplasmic reticulum | circle |
