# Supplementary material for: Modular transcriptional repertoire and MicroRNA target analyses characterize genomic dysregulation in the thymus of Down syndrome infants
Source: PubMed Central journal article supplement (PMC4884935; doi:10.18632/oncotarget.7120), 2016-02-01
Supplement: oncotarget-07-7497-s003.pdf [file oncotarget-07-7497-s003.pdf]

**Table S5: Functional description of interactome nodes linked with HH genes products in DS-DE network**

| DS-DE CGN |                 | Protein-related function | Interacting protein in 1st level | Protein-related function                                                                                                                  | Biological function                      | Node shape (border color)  |
|-----------|-----------------|--------------------------|----------------------------------|-------------------------------------------------------------------------------------------------------------------------------------------|------------------------------------------|----------------------------|
| Comm      | HH gene product |                          |                                  |                                                                                                                                           |                                          |                            |
| A         | CYB5R1          | Oxidative stress         | UBQLN4                           | Polyubiquitin binding; regulation of proteasomal ubiquitin-dependent protein catabolic process                                            | ubiquitination                           | triangle                   |
| A         | ATP6AP1         | macroautophagy           | ANG                              | DNA binding; actin binding; actin filament polymerization                                                                                 | cell process/transcription               | circle                     |
|           |                 |                          | HBA1                             | Hemoglobin, alpha 1                                                                                                                       | cell process/hemoglobin                  | circle                     |
| A         | PTRH1           | hydrolase activity       | PRNP                             | Chaperone binding; microtubule binding                                                                                                    | cell process/protein binding             | circle                     |
| A         | HOMER2          | T-cell development       | APP                              | Amyloid precursor protein                                                                                                                 | cell process                             | circle                     |
| A         | MPST            | antioxidant protein      | CHM                              | GTPase activator activity; Rab GTPase binding;                                                                                            | GTPase activity                          | circle (yellow border)     |
| B         | ANXA9           | binding protein          | ARHGEF10L                        | Rho GTPase activator activity                                                                                                             | GTPase activity                          | circle (yellow border)     |
|           |                 |                          | NDUFA4L2                         | NADH dehydrogenase [ubiquinone] 1 alpha subcomplex subunit 4-like 2                                                                       | cell process/electron transport          | circle                     |
| B         | PIP             | signaling                | DYNLL1                           | Actin cytoskeleton organization; activation of pro-apoptotic gene products                                                                | actin/cytoskeleton                       | diamond                    |
|           |                 |                          | GABARAPL1                        | GABA receptor binding; beta-tubulin binding; autophagic vacuole                                                                           | autophagy                                | square                     |
|           |                 |                          | CEP290                           | Involved in ciliary vesicle formation (Kobayashi et al, 2014)                                                                             | cell process                             | circle                     |
|           |                 |                          | WBP5                             | WW domain binding                                                                                                                         | cell process/binding                     | circle                     |
|           |                 |                          | SGK1                             | ATP binding; protein serine/threonine kinase activity                                                                                     | cell process/signaling                   | circle                     |
|           |                 |                          | BUD13                            | Nuclear mRNA splicing, via spliceosome; RES complex                                                                                       | cell process/transcription               | circle                     |
|           |                 |                          | ESR2                             | DNA binding; sequence-specific DNA binding transcription factor activity                                                                  | cell process/transcription               | circle                     |
|           |                 |                          | RAB5C                            | GTP binding; GTPase activity; endosome organization;protein transport                                                                     | GTPase activity                          | circle (yellow border)     |
|           |                 |                          | UBA1                             | ATP binding; nucleotide binding; cell death; ubiquitin- proteasome system                                                                 | ubiquitination                           | triangle                   |
|           |                 |                          | USP25                            | SUMO binding; cysteine-type peptidase activity; ubiquitin thiolesterase activity                                                          | ubiquitination                           | triangle                   |
|           |                 |                          | USPL1                            | Ubiquitin thiolesterase activity                                                                                                          | ubiquitination                           | triangle                   |
| B         | NLRP12          | T-cell development       | DLG4                             | Protein C-terminus binding; scaffold protein binding                                                                                      | cell process/protein binding             | circle                     |
| C         | CASP4           | Apoptosis; thymopoiesis  | HEATR2                           | Binding                                                                                                                                   | cell process/binding                     | circle                     |
|           |                 |                          | CCDC59                           | Protein binding; regulation of transcription, DNA-dependent                                                                               | cell process/protein binding             | circle                     |
|           |                 |                          | CDK2                             | ATP binding; histone kinase activity; cyclin-dependent protein kinase activity                                                            | cell process/ATP binding                 | circle                     |
|           |                 |                          | COPE                             | COPI coating of Golgi vesicle; intra-Golgi vesicle-mediated transport                                                                     | cell process/Golgi apparatus             | circle                     |
|           |                 |                          | CTNNBIP1                         | Beta-catenin binding; negative regulation of Wnt receptor signaling pathway                                                               | cell process/signaling                   | circle                     |
|           |                 |                          | DCTN1                            | Motor activity; signaling protein activity involved in unfolded protein response; cell death                                              | cell process/cell death                  | circle                     |
|           |                 |                          | EIF2S3                           | GTP binding; GTPase activity; translation initiation factor activity                                                                      | cell process/binding                     | circle                     |
|           |                 |                          | GCN1L1                           | Translation factor activity, nucleic acid binding; regulation of translation                                                              | cell process                             | circle                     |
|           |                 |                          | HIGD1A                           | Response to stress                                                                                                                        | cell process/stress response             | circle                     |
|           |                 |                          | LSM10                            | Histone pre-mRNA DCP binding; RNA splicing                                                                                                | cell process/transcription               | circle                     |
|           |                 |                          | MDN1                             | ATPase binding; protein folding                                                                                                           | cell process/ATP binding                 | circle                     |
|           |                 |                          | MSH6                             | ADP binding; chromatin binding                                                                                                            | cell process/binding                     | circle                     |
|           |                 |                          | MTHFD1L                          | ATP binding; protein homodimerization activity                                                                                            | cell process/ATP binding                 | circle                     |
|           |                 |                          | MYCBPAP                          | Protein binding; cell differentiation                                                                                                     | cell process/differentiation             | circle                     |
|           |                 |                          | NUP93                            | Glucose transport; cytokine-mediated signaling pathway                                                                                    | cell process/transport                   | circle                     |
|           |                 |                          | PSMD6                            | ATP-dependent proteolysis                                                                                                                 | cell process                             | circle                     |
|           |                 |                          | PTPLAD1                          | Rac protein signal transduction; I-kappaB kinase/NF-kappaB cascade                                                                        | cell process/signaling                   | circle                     |
|           |                 |                          | SLC25A1                          | Citrate transmembrane transporter activity; cellular lipid metabolic process                                                              | cell process/transport                   | circle                     |
|           |                 |                          | SLC25A22                         | L-glutamate transmembrane transporter activity                                                                                            | cell process/transport                   | circle                     |
|           |                 |                          | SMC1A                            | ATP binding; chromatin binding; microtubule motor activity                                                                                | cell process/ATP binding                 | circle                     |
|           |                 |                          | SMC2                             | DNA recombination; DNA repair; cell cycle                                                                                                 | cell process/cell cycle                  | circle                     |
|           |                 |                          | SMC3                             | ATP binding; microtubule motor activity                                                                                                   | cell process/cytoskeleton                | circle                     |
|           |                 |                          | SMC4                             | Mitotic chromosome condensation; mitotic sister chromatid segregation; cell cycle                                                         | cell process/cell cycle                  | circle                     |
|           |                 |                          | SNRNP200                         | ATP binding; helicase activity                                                                                                            | cell process/ATP binding                 | circle                     |
|           |                 |                          | SNRPA1                           | RNA binding; RNA splicing                                                                                                                 | cell process/transcription               | circle                     |
|           |                 |                          | SRPRB                            | GTP binding                                                                                                                               | cell process/binding                     | circle                     |
|           |                 |                          | SSR4                             | Calcium ion binding; gene expression                                                                                                      | cell process/binding/calcium ion binding | circle (light blue border) |
|           |                 |                          | TMEM147                          | Endoplasmic reticulum                                                                                                                     | cell process/endoplasmic reticulum       | circle                     |
|           |                 |                          | UBXN1                            | ATPase binding; polyubiquitin binding                                                                                                     | ubiquitination                           | triangle                   |
|           |                 |                          | UMPS                             | Lyase activity                                                                                                                            | cell process/lyase activity              | circle                     |
|           |                 |                          | VDAC1                            | Porin activity                                                                                                                            | cell process/ion transport               | circle                     |
|           |                 |                          | VDAC3                            | Porin activity                                                                                                                            | cell process/ion transport               | circle                     |
| C         | TRIM39          | antiapoptosis            | PDLIM5                           | Actin binding                                                                                                                             | actin/binding                            | diamond                    |
|           |                 |                          | PLCD4                            | Member of the delta class of phospholipase C enzymes                                                                                      | cell process                             | circle                     |
|           |                 |                          | ABL1                             | ATP binding; DNA binding; SH3 domain binding; actin monomer binding                                                                       | cell process/ATP binding                 | circle                     |
|           |                 |                          | FYN                              | ATP binding; ephrin receptor binding; protein tyrosine kinase activity                                                                    | cell process/ATP binding                 | circle                     |
|           |                 |                          | NCK1                             | Actin filament organization                                                                                                               | cell process/cytoskeleton                | circle                     |
|           |                 |                          | UBE2V1                           | MyD88-dependent toll-like receptor signaling pathway; T-cell receptor signaling pathway; cell differentiation                             | cell process/inflammation                | circle                     |
|           |                 |                          | CRK                              | SH2 domain binding; SH3/SH2 adaptor activity; activation of MAPKK activity; involved in phagocytosis of apoptotic cells and cell motility | cell process/phagocytosis                | circle                     |

|   |          |                                       |           |                                                                                                                            |                                          |                             |
|---|----------|---------------------------------------|-----------|----------------------------------------------------------------------------------------------------------------------------|------------------------------------------|-----------------------------|
|   |          |                                       | GRB2      | SH3/SH2 adaptor activity; T-cell costimulation                                                                             | cell process/T-cell development          | circle (light blue border)  |
|   |          |                                       | DCUN1D1   | Protein binding; ubiquitin ligase complex                                                                                  | ubiquitination                           | triangle                    |
|   |          |                                       | HIP2      | UBE2K; belongs to the ubiquitin-conjugating enzyme family                                                                  | ubiquitination                           | triangle                    |
|   |          |                                       | TRIM17    | Metal ion binding; ubiquitin-protein ligase activity; protein autoubiquitination                                           | ubiquitination                           | triangle                    |
|   |          |                                       | UBE2D1    | ATP binding; ubiquitin-protein ligase activity; BMP signaling pathway                                                      | ubiquitination                           | triangle                    |
|   |          |                                       | UBE2D2    | ATP binding; acid-amino acid ligase activity; ubiquitin protein ligase binding                                             | ubiquitination                           | triangle                    |
|   |          |                                       | UBE2D3    | ATP binding; ubiquitin-protein ligase activity; BMP signaling pathway                                                      | ubiquitination                           | triangle                    |
|   |          |                                       | UBE2D4    | ATP binding; acid-amino acid ligase activity; ubiquitin protein ligase binding                                             | ubiquitination                           | triangle                    |
|   |          |                                       | UBE2E1    | ATP binding; ubiquitin-protein ligase activity; ISG15-protein conjugation                                                  | ubiquitination                           | triangle                    |
|   |          |                                       | UBE2E2    | ATP binding; ubiquitin-protein ligase activity; ISG15-protein conjugation                                                  | ubiquitination                           | triangle                    |
|   |          |                                       | UBE2E3    | ATP binding; acid-amino acid ligase activity; ubiquitin protein ligase binding                                             | ubiquitination                           | triangle                    |
|   |          |                                       | UBE2L3    | ATP binding; acid-amino acid ligase activity; ubiquitin protein ligase binding                                             | ubiquitination                           | triangle                    |
|   |          |                                       | UBE2W     | ATP binding; ubiquitin-protein ligase activity                                                                             | ubiquitination                           | triangle                    |
|   |          |                                       | UBTD1     | Ubiquitin family protein                                                                                                   | ubiquitination                           | triangle                    |
| C | FOXJ3    | cell cycle                            | MED23     | Protein binding; transcription coactivator activity;                                                                       | cell process/protein binding             | circle                      |
| C | FBXL5    | iron homeostasis                      | RPOB      | Official symbol: POLR1B. Transcription of ribosomal RNA (rRNA) genes and production of rRNA                                | cell process/transcription               | circle                      |
|   |          |                                       | MYB       | DNA binding; chromatin remodeling; positive regulation of histone H3-K9 methylation                                        | cell process/transcription               | circle                      |
| C | PGRMC1   | adaptor protein for steroid receptors | IKBKE     | ATP binding; I kappa B kinase activity; NF-kappa B-inducing kinase activity                                                | apoptosis                                | vee                         |
|   |          |                                       | VHL       | Transcription factor binding; anti-apoptosis                                                                               | apoptosis/anti-apoptosis                 | vee                         |
|   |          |                                       | ATG5      | protein binding; autophagic vacuole assembly; autophagy                                                                    | autophagy                                | square                      |
|   |          |                                       | PGRMC1    | Adaptor protein for steroid receptors                                                                                      | cell process                             | circle                      |
|   |          |                                       | HLA-B     | MHC class I receptor activity; antigen processing and presentation of peptide antigen via MHC class I                      | cell process/antigen presentation        | circle (orange border)      |
|   |          |                                       | ABCD3     | ATP binding; ATPase activity, coupled to transmembrane movement of substances; protein self-association                    | cell process/ATP binding                 | circle                      |
|   |          |                                       | HEATR2    | Binding                                                                                                                    | cell process/binding                     | circle                      |
|   |          |                                       | EFHD1     | Calcium ion binding                                                                                                        | cell process/binding/calcium ion binding | circle (light blue border)  |
|   |          |                                       | MTNR1A    | Melatonin receptor activity; G-protein signaling, coupled to cyclic nucleotide second messenger; circadian rhythm          | cell process/circadian rhythm            | circle                      |
|   |          |                                       | SFXN1     | Iron ion transport; erythrocyte differentiation                                                                            | cell process/ion transport               | circle                      |
|   |          |                                       | TIMP2     | Enzyme activator activity; negative regulation of cell proliferation; regulation of MAPK cascade                           | cell process/proliferation               | circle                      |
|   |          |                                       | MCC       | Protein binding; Wnt receptor signaling pathway                                                                            | cell process/signaling                   | circle                      |
|   |          |                                       | NME2      | ATP binding; protein histidine kinase activity                                                                             | cell process/signaling                   | circle                      |
|   |          |                                       | PAK2      | ATP binding; nucleotide binding; protein serine/threonine kinase activity                                                  | cell process/signaling                   | circle                      |
|   |          |                                       | MPG       | DNA binding; alkylbase DNA N-glycosylase activity; base-excision repair                                                    | cell process/transcription               | circle                      |
|   |          |                                       | DDOST     | Dolichyl-diphosphooligosaccharide-protein glycotransferase activity                                                        | cell process/transferase activity        | circle                      |
|   |          |                                       | EIF1B     | Regulation of translational initiation                                                                                     | cell process/translation                 | circle                      |
|   |          |                                       | TRAF6     | Histone deacetylase binding; ubiquitin-protein ligase activity                                                             | ubiquitination                           | triangle                    |
| C | PTPN12   | T-cell development                    | GRB2      | SH3/SH2 adaptor activity; T-cell costimulation                                                                             | cell process/T-cell development          | circle (light blue border)  |
| C | NDUFS4   | mitochondrial respiration chain       | NDUFA2    | NADH dehydrogenase (ubiquinone) activity; mitochondrial electron transport                                                 | mitochondrial respiratory chain          | circle (light green border) |
|   |          |                                       | SNCA      | Hsp70 protein binding; alpha-tubulin binding; cysteine-type endopeptidase inhibitor activity involved in apoptotic process | apoptosis                                | vee                         |
| C | NDUFV3   | mitochondrial respiration chain       | NDUFA2    | NADH dehydrogenase (ubiquinone) activity; mitochondrial electron transport                                                 | mitochondrial respiratory chain          | circle (light green border) |
|   |          |                                       | PHYHIP    | Phytanoyl-CoA hydroxylase-interacting protein                                                                              | cell process/binding                     | circle                      |
| C | NFU1     | mitochondrial respiration chain       | C4ORF14   | NOA1, nitric oxide-associated protein 1; mitochondrial activity regulator                                                  | cell process/mitochondrial activity      | circle                      |
|   |          |                                       | SH3BP4    | Protein binding; endocytosis                                                                                               | cell process/protein binding             | circle                      |
| D | P2RY2    | phagocytic clearance                  | SLC9A3R1  | PDZ domain binding; beta-catenin binding; Wnt receptor signaling pathway                                                   | cell process/signaling                   | circle                      |
| D | DOK7     | thymic development                    | GABARAPL2 | Autophagy                                                                                                                  | autophagy                                | square                      |
| D | NFE2     | transcription                         | DLG4      | ATP binding; ephrin receptor binding; protein tyrosine kinase activity                                                     | cell process/ATP binding                 | circle                      |
|   |          |                                       | PHYHIP    | Phytanoyl-CoA hydroxylase-interacting protein                                                                              | cell process/binding                     | circle                      |
| F | LAPTM4B  | autophagy                             | PIK3R1    | ErbB-3 class receptor binding; insulin receptor substrate binding                                                          | cell process/insulin receptor            | circle                      |
|   |          |                                       | ABCB1     | ATP binding; ATPase activity                                                                                               | cell process/ATP binding                 | circle                      |
| F | C11ORF24 | Golgi apparatus                       | CORE      | Official symbol: RYR1. Encodes a ryanodine receptor; calcium release channel in the sarcoplasmic reticulum                 | cell process/ion transport               | circle                      |
| F | ARHGAP1  | T-cell development                    | RHOA      | GTP binding; GTPase activity; actin cytoskeleton organization                                                              | GTPase activity                          | circle (yellow border)      |
|   |          |                                       | RHOC      | GTPase activity; negative regulation of I-kappa B kinase/NF-kappa B cascade                                                | GTPase activity/signaling                | Circle (yellow border)      |
|   |          |                                       | CDC42     | GTP binding; GTPase activity; Thymopoise                                                                                   | cell process/T-cell differentiation      | circle (light blue border)  |
