# Supplementary material for: Modular transcriptional repertoire and MicroRNA target analyses characterize genomic dysregulation in the thymus of Down syndrome infants
Source: PubMed Central journal article supplement (PMC4884935; doi:10.18632/oncotarget.7120), 2016-02-01
Supplement: oncotarget-07-7497-s004.pdf [file oncotarget-07-7497-s004.pdf]

**Table S6: Functional description of interactome nodes linked with HH genes products in CT-CO network**

| CT-CO CGN |                 | Protein-related function        | Interacting protein in 1st level | Protein-related function                                                                                                               | Biological function                      | Node shape (border color)  |
|-----------|-----------------|---------------------------------|----------------------------------|----------------------------------------------------------------------------------------------------------------------------------------|------------------------------------------|----------------------------|
| Comm      | HH gene product |                                 |                                  |                                                                                                                                        |                                          |                            |
| A         | SPTBN2          | T-cell development              | CDK1                             | ATP binding; protein kinase activity; histone kinase activity; cyclin-dependent protein kinase activity                                | cell process/ATP binding                 | circle                     |
|           |                 |                                 | CELSR3                           | G-protein coupled receptor activity; cell adhesion; calcium ion binding                                                                | cell process/binding/calcium ion binding | circle (light blue border) |
|           |                 |                                 | APC                              | T-cell differentiation in thymus; microtubule binding                                                                                  | cell process/T-cell differentiation      | circle (light blue border) |
|           |                 |                                 | ESR2                             | DNA binding; sequence-specific DNA binding transcription factor activity                                                               | cell process/transcription               | circle                     |
| B         | ADNP2           | cell survival                   | NFYC                             | Regulation of transcription; antigen processing and presentation; cellular lipid metabolic process                                     | cell process/antigen presentation        | circle (light blue border) |
| B         | C18ORF25        | T-cell development              | UBE2I                            | SUMO ligase activity                                                                                                                   | ubiquitination                           | triangle                   |
| B         | ERCC3           | transcription                   | MYC                              | Cell cycle progression; apoptosis; cellular transformation; canonical Wnt signaling pathway                                            | apoptosis                                | vee                        |
|           |                 |                                 | PSMC5                            | ATP binding; thyrotropin-releasing hormone receptor binding                                                                            | cell process/ATP binding                 | circle                     |
|           |                 |                                 | AR                               | Androgen receptor activity; androgen binding                                                                                           | cell process/binding                     | circle                     |
|           |                 |                                 | GTF2H1                           | DNA repair; nucleotide-excision repair                                                                                                 | cell process/transcription               | circle                     |
|           |                 |                                 | SMAD2                            | Chromatin binding; SMAD binding                                                                                                        | cell process/transcription               | circle                     |
| B         | HNRNPA0         | antigen presentation            | GABARAP                          | Apoptotic process; microtubule cytoskeleton organization                                                                               | apoptosis                                | vee                        |
|           |                 |                                 | MYC                              | Cell cycle progression; apoptosis; cellular transformation; canonical Wnt signaling pathway                                            | apoptosis                                | vee                        |
|           |                 |                                 | MAP1LC3A                         | Autophagic vacuole assembly; microtubule-associated protein                                                                            | autophagy                                | square                     |
| B         | SNAP23          | MHC-I transport                 | FXR2                             | RNA binding                                                                                                                            | cell process/transcription               | circle                     |
|           |                 |                                 | NAPA                             | SNARE complex disassembly; intracellular protein transport                                                                             | cell process/protein transport           | circle                     |
| B         | TAPBP           | antigen presentation            | CAPR                             | Official symbol: CTNNA2. Hippo signaling pathway; single organismal cell-cell adhesion                                                 | cell process/signaling                   | circle                     |
|           |                 |                                 | PDIA3                            | Antigen processing and presentation of peptide antigen via MHC class I                                                                 | cell process/antigen presentation        | circle (light blue border) |
|           |                 |                                 | TAP1                             | Antigen processing and presentation of endogenous peptide antigen via MHC class I; positive regulation of T-cell mediated cytotoxicity | cell process/antigen presentation        | circle (light blue border) |
|           |                 |                                 | TAP2                             | Antigen processing and presentation of endogenous peptide antigen via MHC class I; positive regulation of T-cell mediated cytotoxicity | cell process/antigen presentation        | circle (light blue border) |
|           |                 |                                 | RPOB                             | Official symbol: POLR1B. Transcription of ribosomal RNA (rRNA) genes and production of rRNA                                            | cell process/transcription               | circle                     |
| B         | TNK2            | signaling                       | CDC42                            | GTP binding; GTPase activity; Thymopoise                                                                                               | cell process/T-cell differentiation      | circle (light blue border) |
|           |                 |                                 | TNK2                             | Component of EGF receptor signaling complex; enhances thymic epithelial cell sustaining thymocyte differentiation                      | cell process/signaling                   | circle                     |
| C         | EDEM3           | T-cell related                  | ZWINT                            | Cell cycle; mitotic cell cycle checkpoint                                                                                              | cell process/cell cycle                  | circle                     |
| C         | RAP1GDS1        | T-cell related                  | CDC42                            | GTP binding; GTPase activity; Thymopoise                                                                                               | cell process/T-cell differentiation      | circle (light blue border) |
|           |                 |                                 | RAC1                             | T-cell costimulation; actin filament polymerization                                                                                    | cell process/T-cell costimulation        | circle (light blue border) |
|           |                 |                                 | MBIP                             | Histone H3 acetylation; protein kinase inhibitor activity                                                                              | cell process/transcription               | circle                     |
|           |                 |                                 | ZNF451                           | Regulation of transcription, DNA-dependent                                                                                             | cell process/transcription               | circle                     |
| D         | ARHGAP18        | T-cell development              | MPHOSPH6                         | RNA binding; nuclear exosome (RNase complex)                                                                                           | cell process/protein binding             | circle                     |
| D         | NDUFB4          | mitochondrial respiration chain | MME                              | Endopeptidase activity; metalloendopeptidase activity                                                                                  | cell process/catalytic activity          | circle                     |
|           |                 |                                 | SNCA                             | Hsp70 protein binding; cysteine-type endopeptidase inhibitor activity involved in apoptotic process                                    | apoptosis                                | vee                        |
| E         | BAG4            | signaling                       | MAP1LC3A                         | Autophagic vacuole assembly; microtubule-associated protein                                                                            | autophagy                                | square                     |
|           |                 |                                 | MAP1LC3B                         | Autophagy                                                                                                                              | autophagy                                | square                     |
|           |                 |                                 | GABARAP                          | Apoptotic process; microtubule cytoskeleton organization                                                                               | apoptosis                                | vee                        |
| F         | BCKDHB          | metabolism                      | BCKDHA                           | Alpha-ketoacid dehydrogenase activity; metal ion binding                                                                               | cell process/ion binding                 | circle                     |
| F         | GLRX3           | T-cell related                  | IKBKE                            | ATP binding; IkappaB kinase activity; NF-kappaB-inducing kinase activity                                                               | apoptosis                                | vee                        |
|           |                 |                                 | HEXDC                            | Carbohydrate metabolic process; hydrolase activity, hydrolyzing O-glycosyl compounds                                                   | cell process/hydrolase activity          | circle                     |
|           |                 |                                 | FRA10AC1                         | Protein binding                                                                                                                        | cell process/protein binding             | circle                     |
|           |                 |                                 | ZNF512B                          | Regulation of transcription, DNA-dependent                                                                                             | cell process/transcription               | circle                     |
| F         | PHF20           | regulator of NF-kB              | MYC                              | Cell cycle progression; apoptosis; cellular transformation; canonical Wnt signaling pathway                                            | apoptosis                                | vee                        |
|           |                 |                                 | MYST1                            | Histone acetylase protein; myeloid cell differentiation                                                                                | cell process/differentiation             | circle                     |
|           |                 |                                 | WDR5                             | Histone acetyltransferase activity; chromatin modification                                                                             | cell process/transcription               | circle                     |
|           |                 |                                 | HIST1H3J                         | Member of the histone H3 family                                                                                                        | cell process/transport                   | circle                     |
|           |                 |                                 | HIST1H4A                         | Member of the histone H4 family                                                                                                        | cell process/transport                   | circle                     |
|           |                 |                                 | DLG4                             | Protein C-terminus binding; scaffold protein binding                                                                                   | cell process/protein binding             | circle                     |
| G         | INVS            | cell migration                  | ZNF512B                          | Regulation of transcription, DNA-dependent                                                                                             | cell process/transcription               | circle                     |
|           |                 |                                 | HIF1AN                           | NF-kappaB binding; oxidoreductase activity; iron ion binding                                                                           | cell process/ion binding                 | circle                     |
|           |                 |                                 | PINX1                            | Negative regulation of cell proliferation; telomerase inhibitor activity                                                               | cell process/transcription               | circle                     |
| H         | DNAJB6          | T-cell development              | MYC                              | Cell cycle progression; apoptosis; cellular transformation; canonical Wnt signaling pathway                                            | apoptosis                                | vee                        |
| H         | LYPLA1          | T-cell development              | NS                               | Official symbol: KRAS. Fc-epsilon receptor signaling pathway; insulin receptor signaling pathway                                       | cell process/signaling                   | circle                     |
|           |                 |                                 | IKBKE                            | ATP binding; IkappaB kinase activity; NF-kappaB-inducing kinase activity                                                               | apoptosis                                | vee                        |
|           |                 |                                 | VHL                              | transcription factor binding; anti-apoptosis                                                                                           | apoptosis/anti-apoptosis                 | vee                        |
| K         | C7ORF25         | mitochondrial activity          | HEXDC                            | Carbohydrate metabolic process; hydrolase activity, hydrolyzing O-glycosyl compounds                                                   | cell process/hydrolase activity          | circle                     |
|           |                 |                                 | FRA10AC1                         | Protein binding                                                                                                                        | cell process/protein binding             | circle                     |
|           |                 |                                 | BRD4                             | Protein phosphorylation; histone acetylation; chromosome segregation                                                                   | cell process/transcription               | circle                     |
|           |                 |                                 | FZR1                             | Kinase activity; ubiquitin-dependent protein catabolic process                                                                         | ubiquitination                           | triangle                   |
| L         | HM13            | antigen presentation            | ABHD16A                          | Hydrolase activity; involved in some aspects of immunity                                                                               | cell process/hydrolase activity          | circle                     |
|           |                 |                                 | P4HB                             | Electron carrier activity; lipid metabolic process; cell redox homeostasis                                                             | cell process/electon transport           | circle                     |
| Q         | PIK3CD          | T-cell related                  | TNPO2                            | Aliase: TNR2. intracellular protein transport; apoptosis                                                                               | apoptosis                                | vee                        |

|  |         |                                                                   |                               |         |
|--|---------|-------------------------------------------------------------------|-------------------------------|---------|
|  | FAM195A | Family with sequence similarity 195, member A                     | cell process                  | circle  |
|  | PIK3R1  | ErbB-3 class receptor binding; insulin receptor substrate binding | cell process/insulin receptor | circle  |
|  | ASCC2   | Regulation of transcription, DNA-dependent                        | cell process/transcription    | circle  |
|  | RALY    | Nuclear mRNA splicing, via spliceosome                            | cell process/transcription    | circle  |
|  | NCK1    | Actin filament organization                                       | cytoskeleton                  | diamond |
