# Supplementary material for: Modular transcriptional repertoire and MicroRNA target analyses characterize genomic dysregulation in the thymus of Down syndrome infants
Source: PubMed Central journal article supplement (PMC4884935; doi:10.18632/oncotarget.7120), 2016-02-01
Supplement: oncotarget-07-7497-s005.pdf [file oncotarget-07-7497-s005.pdf]

**Table S7: Functional description of interactome nodes linked with HH genes products in DS-CO network**

| DS-CO CGN | HH gene product | Protein-related function | Interacting protein in 1st level | Protein-related function                                                                                                   | Biological function                      | Node shape (border color)  |
|-----------|-----------------|--------------------------|----------------------------------|----------------------------------------------------------------------------------------------------------------------------|------------------------------------------|----------------------------|
| A         | ZMYM1           | ion binding              | CTCF                             | Chromatin modification; maintenance of DNA methylation                                                                     | cell process/transcription               | circle                     |
| A         | CHCHD3          | mitochondrial activity   | MYC                              | Cell cycle progression; apoptosis; cellular transformation; canonical Wnt signaling pathway                                | apoptosis                                | vee                        |
|           |                 |                          | SNCA                             | Hsp70 protein binding; alpha-tubulin binding; cysteine-type endopeptidase inhibitor activity involved in apoptotic process | apoptosis                                | vee                        |
|           |                 |                          | SERA                             | L-serine synthesis; cellular amino acid biosynthetic process                                                               | cell process/amino acid biosynthesis     | circle                     |
|           |                 |                          | ERH                              | Cell cycle                                                                                                                 | cell process/cell cycle                  | circle                     |
|           |                 |                          | MAU2                             | Chromosome segregation; cell cycle                                                                                         | cell process/cell cycle                  | circle                     |
|           |                 |                          | CCDC85B                          | Cell differentiation; cytoskeleton                                                                                         | cell process/cytoskeleton                | circle                     |
|           |                 |                          | RECQL4                           | ATP-dependent 3'-5' DNA helicase activity; zinc ion binding                                                                | cell process/ion binding                 | circle                     |
|           |                 |                          | KRTAP4-12                        | Keratin filament                                                                                                           | cell process/keratin                     | circle                     |
| A         | CCNI            | T-cell development       | CEP63                            | Signal transduction in response to DNA damage; DNA damage checkpoint                                                       | cell process/signaling                   | circle                     |
| A         | NCAPH2          | T-cell development       | NCAPD3                           | Mitotic chromosome condensation; cell cycle                                                                                | cell process/cell cycle                  | circle                     |
|           |                 |                          | NCAPG2                           | Inner cell mass cell proliferation; chromosome condensation                                                                | cell process/cell cycle                  | circle                     |
|           |                 |                          | SMC2                             | DNA recombination; DNA repair; cell cycle                                                                                  | cell process/cell cycle                  | circle                     |
|           |                 |                          | SMC4                             | Mitotic chromosome condensation; mitotic sister chromatid segregation; cell cycle                                          | cell process/cell cycle                  | circle                     |
|           |                 |                          | PA                               | Erythrocyte shape and mechanical property regulation; iron ion homeostasis; peptide cross-linking                          | cell process/cell shape                  | circle                     |
| A         | MOBKL1A         | T-cell development       | MST1                             | Catalytic activity                                                                                                         | cell process/catalytic activity          | circle                     |
|           |                 |                          | LATS1                            | Protein serine/threonine kinase activity; cell cycle                                                                       | cell process/signaling                   | circle                     |
|           |                 |                          | LATS2                            | Protein phosphorylation; hippo signaling cascade                                                                           | cell process/signaling                   | circle                     |
|           |                 |                          | STK38                            | Protein phosphorylation; protein modification process                                                                      | cell process/transcription               | circle                     |
| A         | MIER3           | transcription            | HDAC2                            | Histone deacetylase activity (H3-K16 specific); chromatin binding                                                          | cell process/transcription               | circle                     |
| C         | TPM3            | cytoskeleton             | EIF1B                            | Regulation of translational initiation                                                                                     | cell process/transcription               | circle                     |
| C         | ATPIF1          | mitophagy                | CHD3                             | Zinc ion binding                                                                                                           | cell process/ion binding                 | circle                     |
|           |                 |                          | UBQLN4                           | Polyubiquitin binding; regulation of proteasomal ubiquitin-dependent protein catabolic process                             | ubiquitination                           | triangle                   |
|           |                 |                          | PIK3CA                           | Protein serine/threonine kinase activity; insulin receptor substrate binding                                               | cell process/signaling                   | circle                     |
| C         | EXOSC9          | T-cell development       | GABARAP                          | Apoptotic process; microtubule cytoskeleton organization                                                                   | apoptosis                                | vee                        |
|           |                 |                          | GABARAPL1                        | GABA receptor binding; beta-tubulin binding; autophagic vacuole                                                            | autophagy                                | square                     |
|           |                 |                          | DDX39B                           | ATP binding; helicase and hydrolase activity                                                                               | cell process/ATP binding                 | circle                     |
|           |                 |                          | ZFP36                            | C-C chemokine binding; RNA binding                                                                                         | cell process/binding                     | circle                     |
|           |                 |                          | BAT1                             | ATP hydrolysis during pre-mRNA splicing                                                                                    | cell process/transcription               | circle                     |
|           |                 |                          | EXOSC10                          | 3'-5' exonuclease activity; RNA processing                                                                                 | cell process/transcription               | circle                     |
|           |                 |                          | EXOSC2                           | 3'-5'-exoribonuclease activity; positive regulation of cell growth                                                         | cell process/transcription               | circle                     |
|           |                 |                          | EXOSC3                           | 3'-5'-exoribonuclease activity; RNA binding                                                                                | cell process/transcription               | circle                     |
|           |                 |                          | EXOSC4                           | 3'-5'-exoribonuclease activity; histone mRNA catabolic process                                                             | cell process/transcription               | circle                     |
|           |                 |                          | EXOSC7                           | 3'-5'-exoribonuclease activity; RNA processing                                                                             | cell process/transcription               | circle                     |
|           |                 |                          | UBE2I                            | SUMO ligase activity                                                                                                       | ubiquitination                           | triangle                   |
| C         | LRRFIP1         | T-cell development       | CHBCAT                           | Wnt Signaling Pathway; B Cell Receptor Signaling Pathway; adhesion                                                         | cell process/signaling                   | circle                     |
|           |                 |                          | GRIP1                            | Androgen receptor binding; beta-catenin binding                                                                            | cell process/binding                     | circle                     |
|           |                 |                          | FLII                             | Actin cytoskeleton; actin binding protein                                                                                  | actin/cytoskeleton                       | diamond                    |
| C         | RBM4            | transcription            | SMAD5                            | Ubiquitin protein ligase binding; signal transduction, TGFbeta receptor                                                    | ubiquitination                           | triangle                   |
| C         | TAF1A           | transcription            | SET                              | Negative regulation of histone acetylation; apoptosis                                                                      | apoptosis                                | vee                        |
|           |                 |                          | TBP                              | Cell death; transcription factor binding                                                                                   | cell process/cell death                  | circle                     |
|           |                 |                          | TAF1B                            | Transcription, DNA-dependent                                                                                               | cell process/transcription               | circle                     |
|           |                 |                          | TAF1D                            | Regulation of transcription, DNA-dependent                                                                                 | cell process/transcription               | circle                     |
| D         | PHF20L1         | transcription            | CALM1                            | Calcium-binding protein family                                                                                             | cell process/binding/calcium ion binding | circle (light blue border) |
|           |                 |                          | MYST1                            | Histone acetylase protein; myeloid cell differentiation                                                                    | cell process/differentiation             | circle                     |
|           |                 |                          | HIST1H3J                         | Member of the histone H3 family                                                                                            | cell process/transcription               | circle                     |
|           |                 |                          | HIST1H4A                         | Member of the histone H4 family                                                                                            | cell process/transcription               | circle                     |
| E         | DPP8            | cell process             | CXCL11                           | Immune response; chemotaxis; cell surface receptor signaling pathway                                                       | cell process/immune response             | circle (light blue border) |
|           |                 |                          | CXCL10                           | Chemokine activity; immune response; inflammatory response                                                                 | cell process/immune response             | circle (light blue border) |
|           |                 |                          | CXCL12                           | Immune response; chemokine activity; cell adhesion; cellular calcium ion homeostasis                                       | cell process/immune response             | circle (light blue border) |
| E         | PHC1            | T-cell development       | HSPA8                            | ATP binding                                                                                                                | cell process/ATP binding                 | circle                     |
|           |                 |                          | PHC2                             | Metal ion binding; DNA binding                                                                                             | cell process/ion binding                 | circle                     |
|           |                 |                          | CBX2                             | Component of the polycomb multiprotein complex; chromatin remodeling and modification of histones; cell differentiation    | cell process/transcription               | circle                     |
|           |                 |                          | SFMBT1                           | Regulation of transcription, DNA-dependent                                                                                 | cell process/transcription               | circle                     |
|           |                 |                          | BMI1                             | Ubiquitin-protein ligase activity; embryonic skeletal system morphogenesis                                                 | ubiquitination                           | triangle                   |
|           |                 |                          | CBX8                             | Histone ubiquitination                                                                                                     | ubiquitination                           | triangle                   |
|           |                 |                          | PCGF2                            | Histone acetylation; ubiquitin-protein ligase activity                                                                     | ubiquitination                           | triangle                   |
|           |                 |                          | UBE2I                            | SUMO ligase activity                                                                                                       | ubiquitination                           | triangle                   |
| E         | WHSC1           | transcription            | AR                               | Androgen receptor activity; androgen binding                                                                               | cell process/binding                     | circle                     |

|       |                                                        |                                    |           |                                                                                                                                  |                                 |                            |
|-------|--------------------------------------------------------|------------------------------------|-----------|----------------------------------------------------------------------------------------------------------------------------------|---------------------------------|----------------------------|
| F     | HSPG2                                                  | thymus conduit                     | MDM2      | Ubiquitin-protein ligase activity; DNA damage response; signal transduction by p53 class mediator resulting in cell cycle arrest | ubiquitination                  | triangle                   |
|       |                                                        |                                    | ALSD      | Official symbol: PTGS2. Cyclooxygenase; prostaglandin biosynthesis                                                               | cell process/biosynthesis       | circle                     |
|       |                                                        |                                    | ATN1      | Cell death; cell migration                                                                                                       | cell process/cell death         | circle                     |
|       |                                                        |                                    | GRN       | Cytokine activity; positive regulation of epithelial cell proliferation                                                          | cell process/cell proliferation | circle                     |
|       |                                                        |                                    | GRB2      | SH3/SH2 adaptor activity; T-cell costimulation                                                                                   | cell process/T-cell development | circle (light blue border) |
| G     | RPS2                                                   | transcription                      | GFI1B     | Chromatin modification                                                                                                           | cell process/transcription      | circle                     |
|       |                                                        |                                    | GABARAP   | Apoptotic process; microtubule cytoskeleton organization                                                                         | apoptosis                       | vee                        |
|       |                                                        |                                    | MLH1      | DNA damage response; signal transduction resulting in induction of apoptosis                                                     | apoptosis                       | vee                        |
|       |                                                        |                                    | MYC       | Cell cycle progression; apoptosis; cellular transformation; canonical Wnt signaling pathway                                      | apoptosis                       | vee                        |
|       |                                                        |                                    | GABARAPL1 | GABA receptor binding; beta-tubulin binding; autophagic vacuole                                                                  | autophagy                       | square                     |
|       |                                                        |                                    | GABARAPL2 | Autophagy                                                                                                                        | autophagy                       | square                     |
|       |                                                        |                                    | MAP1LC3A  | Autophagic vacuole assembly; microtubule-associated protein                                                                      | autophagy                       | square                     |
|       |                                                        |                                    | ESR1      | Chromatin binding; estrogen receptor activity; estrogen response element binding                                                 | cell process/binding            | circle                     |
|       |                                                        |                                    | STAU1     | Microtubule associated complex; cytoplasmic stress granule                                                                       | cell process/cytoskeleton       | circle                     |
|       |                                                        |                                    | MPP3      | Signal transduction                                                                                                              | cell process/signaling          | circle                     |
|       |                                                        |                                    | ARRB1     | Ubiquitin protein ligase binding; insulin-like growth factor receptor binding                                                    | ubiquitination                  | triangle                   |
| H     | PRPF4B                                                 | T-cell development                 | PRPF4     | Thymocyte survival                                                                                                               | cell process/T-cell development | circle (light blue border) |
| K     | MAP4                                                   | cell motility                      | SNCA      | Hsp70 protein binding; alpha-tubulin binding; cysteine-type endopeptidase inhibitor activity involved in apoptotic process       | apoptosis                       | vee                        |
| Y     | ST13                                                   | cell migration                     | MAP1LC3A  | Autophagic vacuole assembly; microtubule-associated protein                                                                      | autophagy                       | square                     |
|       |                                                        |                                    | GABARAPL2 | Autophagy                                                                                                                        | autophagy                       | square                     |
|       |                                                        |                                    | TNFRSF14  | ubiquitin protein ligase binding                                                                                                 | ubiquitination                  | triangle                   |
|       |                                                        |                                    | BAG1      | chaperone binding; apoptotic process                                                                                             | apoptosis                       | vee                        |
|       |                                                        |                                    | TNF       | cytokine activity; MAPK cascade                                                                                                  | cell process/signaling          | circle                     |
|       |                                                        |                                    | MAP3K3    | ATP binding; MAPK cascade                                                                                                        | cell process/signaling          | circle                     |
| IKBKE | ATP binding; IkappaB kinase activity                   | apoptosis                          | vee       |                                                                                                                                  |                                 |                            |
| APOE  | antioxidant activity; cholesterol transporter activity | cell process/cholesterol transport | circle    |                                                                                                                                  |                                 |                            |
