# Supplementary material for: Modular transcriptional repertoire and MicroRNA target analyses characterize genomic dysregulation in the thymus of Down syndrome infants
Source: PubMed Central journal article supplement (PMC4884935; doi:10.18632/oncotarget.7120), 2016-02-01
Supplement: oncotarget-07-7497-s006.pdf [file oncotarget-07-7497-s006.pdf]

**Table S8: Primer sequences used for validation of gene expression by qPCR**

| <b>Gene</b> | <b>Primer forward (5' - 3')</b> | <b>Primer reverse (5' - 3')</b> | <b>Product length (pb)</b> |
|-------------|---------------------------------|---------------------------------|----------------------------|
| DEFA3       | GACTGCTGTCTGCCCTCTCT            | GCAGAATGCCCAGAGTCTTC            | 337                        |
| DEFA4       | CCTTTGCATGGGATAAAAGC            | CAACCATTCCTGTAGCTCTCA           | 298                        |
| LFT         | GATAAGGTGGAACGCCTGAA            | GAATGGCTGAGGCTTTCTTG            | 312                        |
| S100P       | TACCAGGCTTCCTGCAGAGT            | GGCTCAGCCTAGGGGAATAA            | 256                        |
| TMEM45A     | GCAAAAGCGAACCTGCTATC            | AACGAGGCCTGTCAGAAAGA            | 400                        |
| GAPDH       | ACCACAGTCCATGCCATCAC            | TCCACCACCCTGTTGCTGTA            | 452                        |
